# Supplementary material for: Long‐term mortality and cardiovascular events of seven angiotensin receptor blockers in hypertensive patients: Analysis of a national real‐world database: A retrospective cohort study
Source: PubMed Central journal article supplement (PMC9889622; doi:10.1002/hsr2.1056), 2023-01-31
Supplement: HSR2-6-e1056-s001.pdf [file HSR2-6-e1056-s001.pdf]

**Supplementary Table S1. Definitions of drugs analyzed**

| <b>ARB type</b>    | <b>ATC code</b>                             |
|--------------------|---------------------------------------------|
| <b>Candesartan</b> | C09CA06, C09DB07, C09DA06                   |
| <b>Fimasartan</b>  | C09CA10, C09DA10                            |
| <b>Irbesartan</b>  | C09CA04, C09DA04                            |
| <b>Losartan</b>    | C09CA01, C09DA01, C09DB06                   |
| <b>Olmesartan</b>  | C09CA08, C09DB02, C09DA08, C09DX03, C10BX   |
| <b>Telmisartan</b> | C09CA07, C09DA07, C09DB04                   |
| <b>Valsartan</b>   | C09CA03, C09DB01, C09DA03, C09DB08, C09DX04 |

ARB, angiotensin receptor blocker; ATC, anatomical therapeutic chemical.

**Supplementary Table S2. Definitions of clinical events**

| <b>Clinical event</b>             | <b>KCD code</b>                                                                                               | <b>Definition</b>                                    |
|-----------------------------------|---------------------------------------------------------------------------------------------------------------|------------------------------------------------------|
| <b>MACE</b>                       | I21, I22, I60 - I64, I50, I110, I130, I132, O1640,<br>O1641, O1648, O1649, OA641, OA647,<br>OA648, OA649, I46 | At least one of these codes.                         |
| <b>Cardiac death</b>              | I110, I21, I130, I132, I46, I50, I61 – I64                                                                    | Death record with at least one of these codes.       |
| <b>Non-fatal MI</b>               | I21-I22                                                                                                       | At least one of these codes.                         |
| <b>Stroke</b>                     | I60-I64                                                                                                       | At least one of these codes.                         |
| <b>Hospitalization for HF</b>     | I110, I130, I132, I50                                                                                         | At least one of these codes and record of admission. |
| <b>Coronary revascularization</b> | O1640, O1641, O1648, O1649, OA640, OA641,<br>OA647, OA648, OA649                                              | At least one of these codes.                         |

MACE, major adverse cardiovascular event; MI, myocardial infarction; HF, heart failure.

Supplementary Table S3. Results of Cox-regression analyses showing the hazard ratios of each component of MACE according to different ARBs

| Cardiac death<br>(Ref.=Losartan) | Crude model |        |       |         | Adjusted model* |        |       |         |
|----------------------------------|-------------|--------|-------|---------|-----------------|--------|-------|---------|
|                                  | HR          | 95% CI |       | P-value | HR              | 95% CI |       | P-value |
|                                  |             | Low    | High  |         |                 | Low    | High  |         |
| <b>Candesartan</b>               | 0.951       | 0.845  | 1.071 | 0.409   | 1.027           | 0.912  | 1.157 | 0.656   |
| <b>Fimasartan</b>                | 0.628       | 0.499  | 0.789 | <0.001  | 0.897           | 0.713  | 1.129 | 0.355   |
| <b>Irbesartan</b>                | 1.094       | 0.955  | 1.253 | 0.197   | 1.119           | 0.976  | 1.282 | 0.107   |
| <b>Olmesartan</b>                | 0.765       | 0.690  | 0.849 | <0.001  | 0.949           | 0.855  | 1.053 | 0.327   |
| <b>Telmisartan</b>               | 0.767       | 0.698  | 0.844 | <0.001  | 0.977           | 0.888  | 1.076 | 0.638   |
| <b>Valsartan</b>                 | 0.900       | 0.826  | 0.982 | 0.018   | 1.066           | 0.977  | 1.163 | 0.150   |

  

| Non-fatal MI<br>(Ref.=Losartan) | Crude model |        |       |         | Adjusted model* |        |       |         |
|---------------------------------|-------------|--------|-------|---------|-----------------|--------|-------|---------|
|                                 | HR          | 95% CI |       | P-value | HR              | 95% CI |       | P-value |
|                                 |             | Low    | High  |         |                 | Low    | High  |         |
| <b>Candesartan</b>              | 1.049       | 0.961  | 1.145 | 0.283   | 1.045           | 0.957  | 1.141 | 0.324   |
| <b>Fimasartan</b>               | 0.863       | 0.741  | 1.003 | 0.055   | 0.999           | 0.858  | 1.162 | 0.988   |
| <b>Irbesartan</b>               | 1.035       | 0.930  | 1.152 | 0.529   | 0.996           | 0.895  | 1.109 | 0.941   |
| <b>Olmesartan</b>               | 0.937       | 0.871  | 1.009 | 0.085   | 1.001           | 0.930  | 1.078 | 0.971   |
| <b>Telmisartan</b>              | 0.930       | 0.869  | 0.995 | 0.036   | 1.004           | 0.938  | 1.076 | 0.905   |
| <b>Valsartan</b>                | 0.947       | 0.887  | 1.011 | 0.104   | 0.988           | 0.925  | 1.055 | 0.716   |

  

| Stroke<br>(Ref.=Losartan) | Crude model |        |       |         | Adjusted model* |        |       |         |
|---------------------------|-------------|--------|-------|---------|-----------------|--------|-------|---------|
|                           | HR          | 95% CI |       | P-value | HR              | 95% CI |       | P-value |
|                           |             | Low    | High  |         |                 | Low    | High  |         |
| <b>Candesartan</b>        | 1.009       | 0.964  | 1.056 | 0.690   | 1.042           | 0.996  | 1.091 | 0.077   |
| <b>Fimasartan</b>         | 0.800       | 0.738  | 0.867 | <0.001  | 0.997           | 0.920  | 1.081 | 0.946   |
| <b>Irbesartan</b>         | 1.100       | 1.043  | 1.160 | 0.001   | 1.088           | 1.031  | 1.147 | 0.002   |
| <b>Olmesartan</b>         | 0.881       | 0.847  | 0.915 | <0.001  | 1.004           | 0.965  | 1.043 | 0.859   |
| <b>Telmisartan</b>        | 0.860       | 0.830  | 0.891 | <0.001  | 1.004           | 0.968  | 1.041 | 0.831   |
| <b>Valsartan</b>          | 0.927       | 0.897  | 0.959 | <0.001  | 1.029           | 0.995  | 1.065 | 0.095   |

  

| HF<br>(Ref.=Losartan) | Crude model |        |       |         | Adjusted model* |        |       |         |
|-----------------------|-------------|--------|-------|---------|-----------------|--------|-------|---------|
|                       | HR          | 95% CI |       | P-value | HR              | 95% CI |       | P-value |
|                       |             | Low    | High  |         |                 | Low    | High  |         |
| <b>Candesartan</b>    | 1.139       | 1.052  | 1.234 | 0.001   | 1.166           | 1.076  | 1.263 | <0.001  |

|                                                       |                    |        |       |         |                        |        |       |         |
|-------------------------------------------------------|--------------------|--------|-------|---------|------------------------|--------|-------|---------|
| <b>Fimasartan</b>                                     | 0.867              | 0.751  | 1.000 | 0.049   | 1.097                  | 0.951  | 1.265 | 0.206   |
| <b>Irbesartan</b>                                     | 1.169              | 1.062  | 1.286 | 0.001   | 1.136                  | 1.032  | 1.251 | 0.009   |
| <b>Olmesartan</b>                                     | 0.955              | 0.892  | 1.024 | 0.196   | 1.093                  | 1.019  | 1.171 | 0.012   |
| <b>Telmisartan</b>                                    | 0.820              | 0.767  | 0.877 | <0.001  | 0.960                  | 0.897  | 1.027 | 0.232   |
| <b>Valsartan</b>                                      | 0.912              | 0.857  | 0.971 | 0.004   | 1.003                  | 0.942  | 1.068 | 0.927   |
| <b>Coronary revascularization<br/>(Ref.=Losartan)</b> | <b>Crude model</b> |        |       |         | <b>Adjusted model*</b> |        |       |         |
|                                                       | HR                 | 95% CI |       | P-value | HR                     | 95% CI |       | P-value |
|                                                       |                    | Low    | High  |         |                        | Low    | High  |         |
| <b>Candesartan</b>                                    | 0.770              | 0.409  | 1.450 | 0.418   | 0.687                  | 0.363  | 1.298 | 0.248   |
| <b>Fimasartan</b>                                     | 0.595              | 0.188  | 1.888 | 0.378   | 0.697                  | 0.219  | 2.215 | 0.541   |
| <b>Irbesartan</b>                                     | 0.663              | 0.289  | 1.524 | 0.333   | 0.561                  | 0.244  | 1.293 | 0.175   |
| <b>Olmesartan</b>                                     | 0.816              | 0.498  | 1.337 | 0.420   | 0.880                  | 0.536  | 1.447 | 0.615   |
| <b>Telmisartan</b>                                    | 0.521              | 0.303  | 0.894 | 0.018   | 0.566                  | 0.329  | 0.976 | 0.041   |
| <b>Valsartan</b>                                      | 0.595              | 0.363  | 0.975 | 0.039   | 0.598                  | 0.363  | 0.984 | 0.043   |

\*The following variables were adjusted: age, sex, diabetes mellitus, dyslipidemia, smoking, drinking, exercise, body mass index, systolic blood pressure, albuminuria, glomerular filtration rate, and concomitant medications including calcium antagonists, beta-blockers, angiotensin converting enzyme inhibitor, diuretics, antithrombotic agents, and statins.

CI, confidence interval; HR, hazard ratio.

**Supplementary Table S4-1. Results of Cox-regression analyses showing the hazard ratios of mortality and MACE according to different ARBs in patients  $\geq 70$  years old (n=154,427)**

| <b>All-cause mortality (Ref.=Losartan)</b> | <b>Crude model</b> |        |       |         | <b>Adjusted model*</b> |        |       |         | <b>Adjusted model (with age variable)</b> |        |       |         |
|--------------------------------------------|--------------------|--------|-------|---------|------------------------|--------|-------|---------|-------------------------------------------|--------|-------|---------|
|                                            | HR                 | 95% CI |       | P-value | HR                     | 95% CI |       | P-value | HR                                        | 95% CI |       | P-value |
|                                            |                    | Low    | High  |         |                        | Low    | High  |         |                                           | Low    | High  |         |
| <b>Candesartan</b>                         | 0.956              | 0.894  | 1.022 | 0.598   | 0.975                  | 0.911  | 1.043 | 0.755   | 0.990                                     | 0.925  | 1.059 | 0.930   |
| <b>Fimasartan</b>                          | 0.955              | 0.844  | 1.080 | 0.791   | 1.006                  | 0.889  | 1.138 | 0.447   | 1.058                                     | 0.935  | 1.197 | 0.232   |
| <b>Irbesartan</b>                          | 0.888              | 0.818  | 0.965 | 0.111   | 0.892                  | 0.821  | 0.969 | 0.028   | 0.940                                     | 0.865  | 1.021 | 0.133   |
| <b>Olmesartan</b>                          | 0.961              | 0.908  | 1.018 | 0.403   | 0.994                  | 0.939  | 1.053 | 0.257   | 1.028                                     | 0.971  | 1.089 | 0.170   |
| <b>Telmisartan</b>                         | 0.906              | 0.858  | 0.956 | 0.119   | 0.942                  | 0.892  | 0.995 | 0.316   | 0.962                                     | 0.910  | 1.016 | 0.201   |
| <b>Valsartan</b>                           | 0.926              | 0.881  | 0.974 | 0.485   | 0.957                  | 0.909  | 1.006 | 0.676   | 0.975                                     | 0.927  | 1.025 | 0.429   |

  

| <b>MACE (Ref.=Losartan)</b> | <b>Crude model</b> |        |       |         | <b>Adjusted model*</b> |        |       |         | <b>Adjusted model (with age variable)</b> |        |       |         |
|-----------------------------|--------------------|--------|-------|---------|------------------------|--------|-------|---------|-------------------------------------------|--------|-------|---------|
|                             | HR                 | 95% CI |       | P-value | HR                     | 95% CI |       | P-value | HR                                        | 95% CI |       | P-value |
|                             |                    | Low    | High  |         |                        | Low    | High  |         |                                           | Low    | High  |         |
| <b>Candesartan</b>          | 1.089              | 1.030  | 1.152 | 0.050   | 1.058                  | 1.000  | 1.119 | 0.279   | 1.064                                     | 1.006  | 1.125 | 0.351   |
| <b>Fimasartan</b>           | 1.062              | 0.958  | 1.178 | 0.613   | 1.078                  | 0.972  | 1.195 | 0.313   | 1.098                                     | 0.990  | 1.218 | 0.223   |
| <b>Irbesartan</b>           | 1.105              | 1.035  | 1.181 | 0.031   | 1.062                  | 0.994  | 1.135 | 0.285   | 1.081                                     | 1.012  | 1.156 | 0.175   |
| <b>Olmesartan</b>           | 1.017              | 0.968  | 1.068 | 0.341   | 1.018                  | 0.969  | 1.070 | 0.602   | 1.028                                     | 0.979  | 1.080 | 0.612   |
| <b>Telmisartan</b>          | 0.973              | 0.929  | 1.020 | 0.002   | 0.980                  | 0.935  | 1.027 | 0.017   | 0.987                                     | 0.942  | 1.035 | 0.013   |
| <b>Valsartan</b>            | 1.028              | 0.985  | 1.072 | 0.584   | 1.017                  | 0.974  | 1.062 | 0.511   | 1.024                                     | 0.981  | 1.069 | 0.421   |

\*The following variables were adjusted: sex, diabetes mellitus, dyslipidemia, smoking, drinking, exercise, body mass index, systolic blood pressure, albuminuria, glomerular filtration rate, and concomitant medications including calcium antagonists, beta-blockers, angiotensin converting enzyme inhibitor, diuretics, antithrombotic agents, and statins.

CI, confidence interval; HR, hazard ratio.

**Supplementary Table S4-2. Results of Cox-regression analyses showing the hazard ratios of mortality and MACE according to different ARBs in patients <70 years old (n=626,358)**

| <b>All-cause mortality</b><br>(Ref.=Losartan) | <b>Crude model</b> |        |       |         | <b>Adjusted model*</b> |        |       |         | <b>Adjusted model (with age variable)</b> |        |       |         |
|-----------------------------------------------|--------------------|--------|-------|---------|------------------------|--------|-------|---------|-------------------------------------------|--------|-------|---------|
|                                               | HR                 | 95% CI |       | P-value | HR                     | 95% CI |       | P-value | HR                                        | 95% CI |       | P-value |
|                                               |                    | Low    | High  |         |                        | Low    | High  |         |                                           | Low    | High  |         |
| <b>Candesartan</b>                            | 0.956              | 0.882  | 1.037 | 0.216   | 0.968                  | 0.893  | 1.050 | 0.360   | 1.002                                     | 0.924  | 1.086 | 0.438   |
| <b>Fimasartan</b>                             | 0.750              | 0.652  | 0.862 | 0.001   | 0.817                  | 0.711  | 0.940 | 0.023   | 0.893                                     | 0.777  | 1.027 | 0.150   |
| <b>Irbesartan</b>                             | 1.001              | 0.908  | 1.103 | 0.035   | 0.958                  | 0.869  | 1.056 | 0.603   | 0.976                                     | 0.885  | 1.076 | 0.976   |
| <b>Olmesartan</b>                             | 0.887              | 0.830  | 0.948 | 0.274   | 0.937                  | 0.877  | 1.001 | 0.988   | 0.976                                     | 0.913  | 1.044 | 0.955   |
| <b>Telmisartan</b>                            | 0.889              | 0.837  | 0.945 | 0.270   | 0.932                  | 0.876  | 0.990 | 0.817   | 0.970                                     | 0.913  | 1.032 | 0.866   |
| <b>Valsartan</b>                              | 0.953              | 0.900  | 1.010 | 0.111   | 0.961                  | 0.907  | 1.018 | 0.331   | 1.010                                     | 0.953  | 1.070 | 0.162   |

  

| <b>MACE</b><br>(Ref.=Losartan) | <b>Crude model</b> |        |       |         | <b>Adjusted model*</b> |        |       |         | <b>Adjusted model (with age variable)</b> |        |       |         |
|--------------------------------|--------------------|--------|-------|---------|------------------------|--------|-------|---------|-------------------------------------------|--------|-------|---------|
|                                | HR                 | 95% CI |       | P-value | HR                     | 95% CI |       | P-value | HR                                        | 95% CI |       | P-value |
|                                |                    | Low    | High  |         |                        | Low    | High  |         |                                           | Low    | High  |         |
| <b>Candesartan</b>             | 1.068              | 1.017  | 1.121 | <0.001  | 1.047                  | 0.997  | 1.099 | 0.008   | 1.071                                     | 1.020  | 1.125 | 0.016   |
| <b>Fimasartan</b>              | 0.827              | 0.761  | 0.899 | <0.001  | 0.889                  | 0.817  | 0.966 | 0.003   | 0.950                                     | 0.873  | 1.032 | 0.052   |
| <b>Irbesartan</b>              | 1.129              | 1.066  | 1.197 | <0.001  | 1.066                  | 1.006  | 1.130 | 0.003   | 1.079                                     | 1.018  | 1.143 | 0.022   |
| <b>Olmesartan</b>              | 0.946              | 0.909  | 0.986 | 0.066   | 0.982                  | 0.943  | 1.023 | 0.655   | 1.012                                     | 0.971  | 1.054 | 0.704   |
| <b>Telmisartan</b>             | 0.926              | 0.892  | 0.962 | 0.001   | 0.971                  | 0.934  | 1.008 | 0.225   | 1.002                                     | 0.964  | 1.040 | 0.307   |
| <b>Valsartan</b>               | 0.975              | 0.941  | 1.011 | 0.885   | 0.986                  | 0.951  | 1.022 | 0.780   | 1.022                                     | 0.986  | 1.060 | 0.810   |

\*The following variables were adjusted: sex, diabetes mellitus, dyslipidemia, smoking, drinking, exercise, body mass index, systolic blood pressure, albuminuria, glomerular filtration rate, and concomitant medications including calcium antagonists, beta-blockers, angiotensin converting enzyme inhibitor, diuretics, antithrombotic agents, and statins.

CI, confidence interval; HR, hazard ratio.

**Supplementary Table S4-3. Results of Cox-regression analyses showing the hazard ratios of mortality and MACE according to different ARBs in male patients (n=442,694)**

| All-cause mortality<br>(Ref.=Losartan) | Crude model |        |       |         | Adjusted model* |        |       |         |
|----------------------------------------|-------------|--------|-------|---------|-----------------|--------|-------|---------|
|                                        | HR          | 95% CI |       | P-value | HR              | 95% CI |       | P-value |
|                                        |             | Low    | High  |         |                 | Low    | High  |         |
| <b>Candesartan</b>                     | 0.882       | 0.827  | 0.941 | 0.004   | 0.984           | 0.922  | 1.050 | 0.531   |
| <b>Fimasartan</b>                      | 0.677       | 0.603  | 0.760 | 0.0003  | 0.951           | 0.847  | 1.067 | 0.751   |
| <b>Irbesartan</b>                      | 0.893       | 0.826  | 0.967 | 0.006   | 0.928           | 0.858  | 1.005 | 0.251   |
| <b>Olmesartan</b>                      | 0.754       | 0.715  | 0.796 | 0.002   | 0.980           | 0.928  | 1.034 | 0.558   |
| <b>Telmisartan</b>                     | 0.726       | 0.690  | 0.762 | <0.001  | 0.935           | 0.889  | 0.983 | 0.140   |
| <b>Valsartan</b>                       | 0.802       | 0.766  | 0.840 | 0.527   | 0.988           | 0.942  | 1.035 | 0.292   |

  

| MACE<br>(Ref.=Losartan) | Crude model |        |       |         | Adjusted model* |        |       |         |
|-------------------------|-------------|--------|-------|---------|-----------------|--------|-------|---------|
|                         | HR          | 95% CI |       | P-value | HR              | 95% CI |       | P-value |
|                         |             | Low    | High  |         |                 | Low    | High  |         |
| <b>Candesartan</b>      | 1.049       | 0.997  | 1.103 | <0.001  | 1.078           | 1.024  | 1.133 | 0.172   |
| <b>Fimasartan</b>       | 0.827       | 0.757  | 0.902 | 0.0002  | 1.040           | 0.952  | 1.135 | 0.877   |
| <b>Irbesartan</b>       | 1.135       | 1.069  | 1.204 | <0.001  | 1.109           | 1.045  | 1.178 | 0.023   |
| <b>Olmesartan</b>       | 0.886       | 0.849  | 0.924 | <0.001  | 1.031           | 0.988  | 1.076 | 0.427   |
| <b>Telmisartan</b>      | 0.882       | 0.849  | 0.917 | <0.001  | 1.030           | 0.990  | 1.070 | 0.351   |
| <b>Valsartan</b>        | 0.928       | 0.894  | 0.963 | 0.097   | 1.038           | 1.000  | 1.077 | 0.635   |

\*The following variables were adjusted: age, diabetes mellitus, dyslipidemia, smoking, drinking, exercise, body mass index, systolic blood pressure, albuminuria, glomerular filtration rate, and concomitant medications including calcium antagonists, beta-blockers, angiotensin converting enzyme inhibitor, diuretics, antithrombotic agents, and statins.

CI, confidence interval; HR, hazard ratio.

**Supplementary Table S4-4. Results of Cox-regression analyses showing the hazard ratios of mortality and MACE according to different ARBs in female patients (n=338,091)**

| <b>All-cause mortality<br/>(Ref.=Losartan)</b> | <b>Crude model</b> |        |       |         | <b>Adjusted model*</b> |        |       |         |
|------------------------------------------------|--------------------|--------|-------|---------|------------------------|--------|-------|---------|
|                                                | HR                 | 95% CI |       | P-value | HR                     | 95% CI |       | P-value |
|                                                |                    | Low    | High  |         |                        | Low    | High  |         |
| <b>Candesartan</b>                             | 0.922              | 0.846  | 1.004 | 0.136   | 1.013                  | 0.930  | 1.104 | 0.910   |
| <b>Fimasartan</b>                              | 0.728              | 0.624  | 0.849 | 0.007   | 1.019                  | 0.873  | 1.189 | 0.885   |
| <b>Irbesartan</b>                              | 0.921              | 0.830  | 1.022 | 0.226   | 0.980                  | 0.883  | 1.087 | 0.515   |
| <b>Olmesartan</b>                              | 0.888              | 0.826  | 0.955 | 0.561   | 1.044                  | 0.971  | 1.123 | 0.293   |
| <b>Telmisartan</b>                             | 0.808              | 0.753  | 0.866 | 0.015   | 1.021                  | 0.951  | 1.095 | 0.718   |
| <b>Valsartan</b>                               | 0.861              | 0.807  | 0.919 | 0.675   | 0.989                  | 0.927  | 1.055 | 0.486   |

  

| <b>MACE<br/>(Ref.=Losartan)</b> | <b>Crude model</b> |        |       |         | <b>Adjusted model*</b> |        |       |         |
|---------------------------------|--------------------|--------|-------|---------|------------------------|--------|-------|---------|
|                                 | HR                 | 95% CI |       | P-value | HR                     | 95% CI |       | P-value |
|                                 |                    | Low    | High  |         |                        | Low    | High  |         |
| <b>Candesartan</b>              | 1.031              | 0.977  | 1.087 | <0.001  | 1.054                  | 0.999  | 1.112 | 0.030   |
| <b>Fimasartan</b>               | 0.794              | 0.721  | 0.875 | <0.001  | 0.958                  | 0.869  | 1.055 | 0.284   |
| <b>Irbesartan</b>               | 1.058              | 0.992  | 1.128 | <0.001  | 1.045                  | 0.980  | 1.114 | 0.135   |
| <b>Olmesartan</b>               | 0.931              | 0.888  | 0.975 | 0.609   | 1.004                  | 0.958  | 1.052 | 0.912   |
| <b>Telmisartan</b>              | 0.851              | 0.814  | 0.890 | <0.001  | 0.952                  | 0.910  | 0.996 | 0.010   |
| <b>Valsartan</b>                | 0.948              | 0.910  | 0.987 | 0.671   | 1.004                  | 0.964  | 1.046 | 0.891   |

\*The following variables were adjusted: age, diabetes mellitus, dyslipidemia, smoking, drinking, exercise, body mass index, systolic blood pressure, albuminuria, glomerular filtration rate, and concomitant medications including calcium antagonists, beta-blockers, angiotensin converting enzyme inhibitor, diuretics, antithrombotic agents, and statins.

CI, confidence interval; HR, hazard ratio.



**Supplementary Table S4-5. Results of Cox-regression analyses showing the hazard ratios of mortality and MACE according to different ARBs in diabetes patients (n=190,528)**

| <b>All-cause mortality<br/>(Ref.=Losartan)</b> | <b>Crude model</b> |        |       |         | <b>Adjusted model*</b> |        |       |         |
|------------------------------------------------|--------------------|--------|-------|---------|------------------------|--------|-------|---------|
|                                                | HR                 | 95% CI |       | P-value | HR                     | 95% CI |       | P-value |
|                                                |                    | Low    | High  |         |                        | Low    | High  |         |
| <b>Candesartan</b>                             | 0.874              | 0.803  | 0.950 | 0.764   | 0.959                  | 0.882  | 1.043 | 0.334   |
| <b>Fimasartan</b>                              | 0.871              | 0.749  | 1.013 | 0.833   | 1.103                  | 0.948  | 1.283 | 0.112   |
| <b>Irbesartan</b>                              | 0.902              | 0.820  | 0.993 | 0.609   | 0.964                  | 0.875  | 1.061 | 0.464   |
| <b>Olmesartan</b>                              | 0.838              | 0.779  | 0.902 | 0.103   | 0.980                  | 0.910  | 1.055 | 0.664   |
| <b>Telmisartan</b>                             | 0.825              | 0.771  | 0.883 | 0.023   | 0.953                  | 0.891  | 1.021 | 0.163   |
| <b>Valsartan</b>                               | 0.883              | 0.829  | 0.940 | 0.986   | 1.005                  | 0.943  | 1.071 | 0.687   |

  

| <b>MACE<br/>(Ref.=Losartan)</b> | <b>Crude model</b> |        |       |         | <b>Adjusted model*</b> |        |       |         |
|---------------------------------|--------------------|--------|-------|---------|------------------------|--------|-------|---------|
|                                 | HR                 | 95% CI |       | P-value | HR                     | 95% CI |       | P-value |
|                                 |                    | Low    | High  |         |                        | Low    | High  |         |
| <b>Candesartan</b>              | 1.009              | 0.947  | 1.075 | 0.051   | 1.055                  | 0.990  | 1.124 | 0.293   |
| <b>Fimasartan</b>               | 0.836              | 0.739  | 0.946 | 0.012   | 0.984                  | 0.870  | 1.114 | 0.450   |
| <b>Irbesartan</b>               | 1.011              | 0.940  | 1.088 | 0.078   | 1.026                  | 0.954  | 1.104 | 0.966   |
| <b>Olmesartan</b>               | 0.939              | 0.888  | 0.993 | 0.466   | 1.034                  | 0.977  | 1.094 | 0.712   |
| <b>Telmisartan</b>              | 0.926              | 0.879  | 0.975 | 0.152   | 1.021                  | 0.969  | 1.075 | 0.859   |
| <b>Valsartan</b>                | 0.985              | 0.938  | 1.034 | 0.163   | 1.056                  | 1.005  | 1.108 | 0.168   |

\*The following variables were adjusted: age, sex, dyslipidemia, smoking, drinking, exercise, body mass index, systolic blood pressure, albuminuria, glomerular filtration rate, and concomitant medications including calcium antagonists, beta-blockers, angiotensin converting enzyme inhibitor, diuretics, antithrombotic agents, and statins.

CI, confidence interval; HR, hazard ratio.

**Supplementary Table S4-6. Results of Cox-regression analyses showing the hazard ratios of mortality and MACE according to different ARBs in non-diabetes patients (n=590,257)**

| <b>All-cause mortality<br/>(Ref.=Losartan)</b> | <b>Crude model</b> |        |       |         | <b>Adjusted model*</b> |        |       |         |
|------------------------------------------------|--------------------|--------|-------|---------|------------------------|--------|-------|---------|
|                                                | HR                 | 95% CI |       | P-value | HR                     | 95% CI |       | P-value |
|                                                |                    | Low    | High  |         |                        | Low    | High  |         |
| <b>Candesartan</b>                             | 0.885              | 0.829  | 0.945 | 0.003   | 1.020                  | 0.955  | 1.089 | 0.151   |
| <b>Fimasartan</b>                              | 0.643              | 0.572  | 0.723 | <0.001  | 0.916                  | 0.815  | 1.029 | 0.194   |
| <b>Irbesartan</b>                              | 0.845              | 0.777  | 0.918 | 0.284   | 0.936                  | 0.861  | 1.018 | 0.229   |
| <b>Olmesartan</b>                              | 0.803              | 0.761  | 0.847 | 0.647   | 1.019                  | 0.966  | 1.075 | 0.088   |
| <b>Telmisartan</b>                             | 0.7440             | 0.707  | 0.782 | <0.001  | 0.974                  | 0.926  | 1.025 | 0.867   |
| <b>Valsartan</b>                               | 0.811              | 0.773  | 0.850 | 0.935   | 0.987                  | 0.941  | 1.035 | 0.676   |

  

| <b>MACE<br/>(Ref.=Losartan)</b> | <b>Crude model</b> |        |       |         | <b>Adjusted model*</b> |        |       |         |
|---------------------------------|--------------------|--------|-------|---------|------------------------|--------|-------|---------|
|                                 | HR                 | 95% CI |       | P-value | HR                     | 95% CI |       | P-value |
|                                 |                    | Low    | High  |         |                        | Low    | High  |         |
| <b>Candesartan</b>              | 1.033              | 0.987  | 1.080 | <0.001  | 1.073                  | 1.026  | 1.123 | 0.027   |
| <b>Fimasartan</b>               | 0.812              | 0.752  | 0.876 | <0.001  | 1.007                  | 0.933  | 1.087 | 0.547   |
| <b>Irbesartan</b>               | 1.106              | 1.047  | 1.167 | <0.001  | 1.115                  | 1.056  | 1.178 | 0.001   |
| <b>Olmesartan</b>               | 0.887              | 0.855  | 0.921 | 0.002   | 1.011                  | 0.973  | 1.050 | 0.315   |
| <b>Telmisartan</b>              | 0.838              | 0.809  | 0.869 | <0.001  | 0.984                  | 0.950  | 1.020 | 0.006   |
| <b>Valsartan</b>                | 0.906              | 0.876  | 0.936 | 0.030   | 1.008                  | 0.975  | 1.043 | 0.199   |

\*The following variables were adjusted: age, sex, dyslipidemia, smoking, drinking, exercise, body mass index, systolic blood pressure, albuminuria, glomerular filtration rate, and concomitant medications including calcium antagonists, beta-blockers, angiotensin converting enzyme inhibitor, diuretics, antithrombotic agents, and statins.

CI, confidence interval; HR, hazard ratio.

**Supplementary Table S5-1. Risks for all-cause mortality and MACE according to different ARBs compared to those associated with losartan (only ARB)**

| All-cause mortality<br>(Ref.=Losartan) | Crude model |        |       |         | Adjusted model* |        |       |         |
|----------------------------------------|-------------|--------|-------|---------|-----------------|--------|-------|---------|
|                                        | HR          | 95% CI |       | P-value | HR              | 95% CI |       | P-value |
|                                        |             | Low    | High  |         |                 | Low    | High  |         |
| <b>Candesartan</b>                     | 0.778       | 0.634  | 0.956 | 0.717   | 0.918           | 0.747  | 1.128 | 0.461   |
| <b>Fimasartan</b>                      | 0.694       | 0.514  | 0.938 | 0.262   | 1.024           | 0.757  | 1.384 | 0.744   |
| <b>Irbesartan</b>                      | 0.701       | 0.534  | 0.920 | 0.247   | 0.769           | 0.586  | 1.009 | 0.040   |
| <b>Olmesartan</b>                      | 0.834       | 0.721  | 0.966 | 0.568   | 1.083           | 0.936  | 1.254 | 0.128   |
| <b>Telmisartan</b>                     | 0.830       | 0.728  | 0.947 | 0.591   | 1.092           | 0.957  | 1.246 | 0.069   |
| <b>Valsartan</b>                       | 0.828       | 0.725  | 0.946 | 0.619   | 1.023           | 0.896  | 1.169 | 0.481   |

  

| MACE<br>(Ref.=Losartan) | Crude model |        |       |         | Adjusted model* |        |       |         |
|-------------------------|-------------|--------|-------|---------|-----------------|--------|-------|---------|
|                         | HR          | 95% CI |       | P-value | HR              | 95% CI |       | P-value |
|                         |             | Low    | High  |         |                 | Low    | High  |         |
| <b>Candesartan</b>      | 1.164       | 0.960  | 1.412 | 0.065   | 1.256           | 1.035  | 1.524 | 0.109   |
| <b>Fimasartan</b>       | 0.940       | 0.702  | 1.258 | 0.627   | 1.127           | 0.842  | 1.510 | 0.843   |
| <b>Irbesartan</b>       | 1.217       | 0.961  | 1.541 | 0.052   | 1.238           | 0.978  | 1.569 | 0.241   |
| <b>Olmesartan</b>       | 1.001       | 0.860  | 1.165 | 0.978   | 1.138           | 0.977  | 1.326 | 0.596   |
| <b>Telmisartan</b>      | 0.798       | 0.689  | 0.926 | <0.001  | 0.925           | 0.797  | 1.074 | 0.006   |
| <b>Valsartan</b>        | 0.934       | 0.811  | 1.077 | 0.266   | 1.053           | 0.913  | 1.214 | 0.473   |

\*The following variables were controlled in the adjusted model: age, sex, body mass index, systolic blood pressure, diabetes mellitus, dyslipidemia, cigarette smoking, alcohol drinking, physical activity, household income, glomerular filtration rate.

MACE, major adverse cardiovascular event; ARB, angiotensin receptor blocker; HR, hazard ratio; CI, confidence interval

**Supplementary Table S5-2. Risks for all-cause mortality and MACE according to different ARBs compared to those associated with losartan (ARB with one class of anti-hypertensive drug)**

| All-cause mortality<br>(Ref.=Losartan) | Crude model |        |       |         | Adjusted model* |        |       |         |
|----------------------------------------|-------------|--------|-------|---------|-----------------|--------|-------|---------|
|                                        | HR          | 95% CI |       | P-value | HR              | 95% CI |       | P-value |
|                                        |             | Low    | High  |         |                 | Low    | High  |         |
| <b>Candesartan</b>                     | 0.808       | 0.712  | 0.916 | 0.913   | 0.999           | 0.880  | 1.134 | 0.988   |
| <b>Fimasartan</b>                      | 0.732       | 0.598  | 0.895 | 0.230   | 1.061           | 0.867  | 1.298 | 0.488   |
| <b>Irbesartan</b>                      | 0.823       | 0.705  | 0.961 | 0.848   | 0.949           | 0.812  | 1.109 | 0.456   |
| <b>Olmesartan</b>                      | 0.800       | 0.725  | 0.882 | 0.721   | 1.029           | 0.933  | 1.136 | 0.486   |
| <b>Telmisartan</b>                     | 0.739       | 0.674  | 0.811 | 0.022   | 0.955           | 0.870  | 1.048 | 0.282   |
| <b>Valsartan</b>                       | 0.813       | 0.745  | 0.888 | 0.977   | 0.999           | 0.915  | 1.091 | 0.975   |

  

| MACE<br>(Ref.=Losartan) | Crude model |        |       |         | Adjusted model* |        |       |         |
|-------------------------|-------------|--------|-------|---------|-----------------|--------|-------|---------|
|                         | HR          | 95% CI |       | P-value | HR              | 95% CI |       | P-value |
|                         |             | Low    | High  |         |                 | Low    | High  |         |
| <b>Candesartan</b>      | 0.925       | 0.825  | 1.036 | 0.702   | 1.024           | 0.913  | 1.148 | 0.775   |
| <b>Fimasartan</b>       | 0.901       | 0.757  | 1.073 | 0.930   | 1.095           | 0.919  | 1.304 | 0.285   |
| <b>Irbesartan</b>       | 0.932       | 0.810  | 1.073 | 0.657   | 0.990           | 0.860  | 1.139 | 0.745   |
| <b>Olmesartan</b>       | 0.907       | 0.829  | 0.991 | 0.986   | 1.024           | 0.936  | 1.120 | 0.712   |
| <b>Telmisartan</b>      | 0.857       | 0.788  | 0.932 | 0.119   | 0.990           | 0.910  | 1.077 | 0.601   |
| <b>Valsartan</b>        | 0.839       | 0.772  | 0.911 | 0.030   | 0.950           | 0.874  | 1.032 | 0.094   |

\*The following variables were controlled in the adjusted model: age, sex, body mass index, systolic blood pressure, diabetes mellitus, dyslipidemia, cigarette smoking, alcohol drinking, physical activity, household income, glomerular filtration rate.

MACE, major adverse cardiovascular event; ARB, angiotensin receptor blocker; HR, hazard ratio; CI, confidence interval

**Supplementary Table S5-3. Risks for all-cause mortality and MACE according to different ARBs compared to those associated with losartan (ARB with two more classes of anti-hypertensive drug)**

| All-cause mortality<br>(Ref.=Losartan) | Crude model |        |       |         | Adjusted model* |        |       |         |
|----------------------------------------|-------------|--------|-------|---------|-----------------|--------|-------|---------|
|                                        | HR          | 95% CI |       | P-value | HR              | 95% CI |       | P-value |
|                                        |             | Low    | High  |         |                 | Low    | High  |         |
| <b>Candesartan</b>                     | 0.914       | 0.862  | 0.969 | 0.055   | 0.998           | 0.941  | 1.059 | 0.582   |
| <b>Fimasartan</b>                      | 0.745       | 0.667  | 0.832 | 0.001   | 0.978           | 0.875  | 1.093 | 0.899   |
| <b>Irbesartan</b>                      | 0.910       | 0.847  | 0.977 | 0.145   | 0.957           | 0.891  | 1.027 | 0.366   |
| <b>Olmesartan</b>                      | 0.852       | 0.810  | 0.897 | 0.378   | 0.993           | 0.943  | 1.045 | 0.695   |
| <b>Telmisartan</b>                     | 0.823       | 0.785  | 0.864 | 0.011   | 0.966           | 0.920  | 1.013 | 0.382   |
| <b>Valsartan</b>                       | 0.864       | 0.826  | 0.903 | 0.740   | 0.998           | 0.954  | 1.043 | 0.488   |

  

| MACE<br>(Ref.=Losartan) | Crude model |        |       |         | Adjusted model* |        |       |         |
|-------------------------|-------------|--------|-------|---------|-----------------|--------|-------|---------|
|                         | HR          | 95% CI |       | P-value | HR              | 95% CI |       | P-value |
|                         |             | Low    | High  |         |                 | Low    | High  |         |
| <b>Candesartan</b>      | 1.017       | 0.977  | 1.058 | 0.012   | 1.079           | 1.037  | 1.122 | 0.145   |
| <b>Fimasartan</b>       | 0.871       | 0.811  | 0.936 | <0.001  | 1.027           | 0.956  | 1.104 | 0.448   |
| <b>Irbesartan</b>       | 1.061       | 1.012  | 1.112 | <0.001  | 1.096           | 1.046  | 1.149 | 0.045   |
| <b>Olmesartan</b>       | 0.955       | 0.923  | 0.988 | 0.195   | 1.047           | 1.012  | 1.084 | 0.748   |
| <b>Telmisartan</b>      | 0.950       | 0.920  | 0.981 | 0.081   | 1.052           | 1.019  | 1.086 | 0.979   |
| <b>Valsartan</b>        | 0.972       | 0.944  | 1.002 | 0.927   | 1.067           | 1.035  | 1.099 | 0.297   |

\*The following variables were controlled in the adjusted model: age, sex, body mass index, systolic blood pressure, diabetes mellitus, dyslipidemia, cigarette smoking, alcohol drinking, physical activity, household income, glomerular filtration rate.

MACE, major adverse cardiovascular event; ARB, angiotensin receptor blocker; HR, hazard ratio; CI, confidence interval
